# Supplementary material for: Association between Antibiotic Exposure and Systemic Immune Parameters in Cancer Patients Receiving Checkpoint Inhibitor Therapy
Source: MDPI journal article supplement (doi:10.3390/cancers14051327), 2022-03-04
Supplement: s1 [file s1]

# **Supplemental material for “Association between antibiotic exposure and systemic immune parameters in cancer patients receiving checkpoint inhibitor therapy.”**

Mitchell S. von Itzstein<sup>1,2†</sup>, Amrit S. Gonugunta<sup>3†</sup>, Thomas Sheffield<sup>4</sup>, Jade Homs<sup>1,2</sup>, Jonathan E. Dowell<sup>1,2</sup>, Andrew Y. Koh<sup>5</sup>, Prithvi Raj<sup>6</sup>, Farjana Fattah<sup>2</sup>, Yiqing Wang<sup>4</sup>, Vijay S. Basava<sup>2</sup>, Shaheen Khan<sup>6</sup>, Jason Y. Park<sup>7</sup>, Vinita Papat<sup>3</sup>, Jessica M. Saltarski<sup>2</sup>, Yvonne Gloria-McCutchen<sup>2</sup>, David Hsieh<sup>1,2</sup>, Jared Ostmeier<sup>4</sup>, Yang Xie<sup>2,4</sup>, Quan-Zhen Li<sup>6</sup>, Edward K. Wakeland<sup>6</sup> and David E. Gerber<sup>1,2,4\*</sup>

<sup>1</sup>Department of Internal Medicine (Division of Hematology-Oncology)

<sup>2</sup>Harold C. Simmons Comprehensive Cancer Center

<sup>3</sup>School of Medicine

<sup>4</sup>Department of Population and Data Sciences

<sup>5</sup>Department of Pediatrics

<sup>6</sup>Department of Immunology

<sup>7</sup>Department of Pathology; University of Texas Southwestern Medical Center. Dallas, Texas. USA

†These authors contributed equally

\*Correspondence: david.gerber@utsouthwestern.edu

## **Contents**

Supplemental Table S1

Supplemental Table S2

Supplemental Table S3

Supplemental Table S4

Supplemental Table S5

Supplemental Table S6

Supplemental Figure S1

Supplemental Figure S2

**Supplemental Tables****Supplemental Table S1.** List of cytokines in multiplex panel.

| <b>Total</b>        | <b>Passed Quality Control</b> |
|---------------------|-------------------------------|
| 6Ckine/ CCL21       | 6Ckine/ CCL21                 |
| BCA-1/ CXCL13       | BCA-1/ CXCL13                 |
| CTACK/ CCL27        | CTACK/ CCL27                  |
| ENA-78/ CXCL5       | Eotaxin/ CCL11                |
| Eotaxin/ CCL11      | Eotaxin-2/ CCL24              |
| Eotaxin-2/ CCL24    | Fractalkine/ CX3CL1           |
| Eotaxin-3/ CCL26    | Gro-a/ CXCL1                  |
| Fractalkine/ CX3CL1 | Gro-b/ CXCL2                  |
| GCP-2/ CXCL6        | I-309/ CCL1                   |
| GM-CSF              | IFN- $\gamma$                 |
| Gro-a/ CXCL1        | IL-4                          |
| Gro-b/ CXCL2        | IL-8/ CXCL8                   |
| I-309/ CCL1         | IL-10                         |
| IFN- $\gamma$       | IL-16                         |
| IL-1b               | IP-10/ CXCL10                 |
| IL-2                | I-TAC/ CXCL11                 |
| IL-4                | MCP-1/ CCL2                   |
| IL-6                | MCP-2/ CCL8                   |
| IL-8/ CXCL8         | MCP-4/ CCL13                  |
| IL-10               | MDC/ CCL22                    |
| IL-16               | MIF                           |
| IP-10/ CXCL10       | MIG/ CXCL9                    |
| I-TAC/ CXCL11       | MIP-1a/ CCL3                  |
| MCP-1/ CCL2         | MIP-1d/ CCL15                 |
| MCP-2/ CCL8         | MIP-3a/ CCL20                 |
| MCP-3/ CCL7         | MIP-3b/ CCL19                 |
| MCP-4/ CCL13        | MPIF-1/ CCL23                 |

|                  |                  |
|------------------|------------------|
| MDC/ CCL22       | SCYB16/ CXCL16   |
| MIF              | SDF-1a+b/ CXCL12 |
| MIG/ CXCL9       | TECK/ CCL25      |
| MIP-1a/ CCL3     | TNF-a            |
| MIP-1d/ CCL15    |                  |
| MIP-3a/ CCL20    |                  |
| MIP-3b/ CCL19    |                  |
| MPIF-1/ CCL23    |                  |
| SCYB16/ CXCL16   |                  |
| SDF-1a+b/ CXCL12 |                  |
| TARC/ CCL17      |                  |
| TECK/ CCL25      |                  |
| TNF-a            |                  |

**Supplemental Table S2.** List of antibodies in multiplex panel.

| Total                 |                             |                                |                        |
|-----------------------|-----------------------------|--------------------------------|------------------------|
| S100                  | Cytochrome C                | Histone H4                     | Prothrombin protein    |
| Aggrecan              | Decorin-bovine              | Insulin                        | Ribo Phosphoprotein P0 |
| AGTR                  | DGPS                        | Intrinsic Factor               | Ribo Phosphoprotein P1 |
| alpha-actinine        | DNA Polymerase beta (POLB)  | Jo-1                           | Ribo Phosphoprotein P2 |
| Alpha Fodrin          | dsDNA                       | Ku (P70/P80)                   | Ro/SSA (52 Kda)        |
| Amyloid               | EBNA1                       | La/SSB                         | Ro/SSA (60 Kda)        |
| AQP4                  | Elastin                     | Laminin                        | Scl-70/Topoisomerase I |
| B2-microglobulin      | Entaktin EDTA               | LC1                            | Sm                     |
| B2 glycoprotein 1     | Factor I                    | LKM1                           | Sm/RNP                 |
| BAFF                  | Factor P                    | LPS                            | SmD                    |
| BPI                   | FactorB                     | M2                             | SmD1,D2,D3             |
| Cardolipin            | FactorD                     | Matrigel                       | SP100                  |
| CENP-A                | FactorH                     | MDA5                           | Sphingomyelin          |
| CENP-B                | Fibrinogen IV               | Mi-2                           | SRP54                  |
| Chondroitin Sulfate C | Fibrinogen S                | Mitochondrial antigen          | ssDNA                  |
| Chromatin             | Fibronectin                 | MPO                            | ssRNA                  |
| Collagen I            | GAD65                       | Muscarinic receptor            | T1F1 gama              |
| Collagen II           | GBM                         | Myelin-associated glycoprotein | Thyroglobulin          |
| Collagen III          | Genomic DNA                 | Myelin basic protein (MBP)     | TNFa                   |
| Collagen IV           | Gliadin                     | Myosin                         | Topoisomerase I        |
| Collagen V            | Glycated Albumin-human      | Nucleolin                      | TPO                    |
| Collagen VI           | Glycyl-tRNA Synthetase (EJ) | Nucleosome                     | TTG                    |
| complement C1q        | GP210                       | Nup 62                         | U1-snRNP 68/70         |
| complement C3/C3a     | GP2                         | PCNA                           | U1-snRNP A             |
| complement C3b        | Hemocyanin                  | Peroxiredoxin 1                |                        |

|                               |                                 |                           |                            |
|-------------------------------|---------------------------------|---------------------------|----------------------------|
| complement C4                 | Heparan sulfate                 | Phosphatidylinositol      | U1-snRNP B/B'              |
| complement C5                 | proteoglycan                    | PL-7                      | U1-snRNP C                 |
| complement C6                 | Heparan Sulphate                | PL-12                     | Vimentin                   |
| complement C7                 | Heparin                         | PM/Scl-75                 | Vitronectin                |
| complement C8                 | Core Histone                    | PM/Scl 100                |                            |
| complement C9                 | Histone H1                      | POLB                      |                            |
| CRP                           | Histone H2A                     | PR3                       |                            |
|                               | Histone H2B                     | Proteoglycan              |                            |
|                               | Histone H3                      |                           |                            |
| <b>Passed Quality Control</b> |                                 |                           |                            |
| AGGRECAN                      | EBNA1                           | LC1                       | PL.7                       |
| AGTR                          | ELASTIN                         | M2                        | PM.SCL.100                 |
| ALPHA.FODRI<br>N              | ENTAKTIN.EDTA                   | MATRIGEL                  | RIBO.PHOSPHOPR<br>OTEIN.P0 |
| AQP4                          | FACTOR.I                        | MDA5                      | RIBO.PHOSPHOPR<br>OTEIN.P1 |
| BPI                           | FACTORB                         | MI.2                      | RIBO.PHOSPHOPR<br>OTEIN.P2 |
| CENP.B                        | FACTORH                         | MITOCHONDRIAL.<br>ANTIGEN | RO.SSA..52.KDA.            |
| COLLAGEN.IV                   | FIBRINOGEN.IV                   | MPO                       | SCL.70.TOPOISOM<br>ERASE.I |
| COMPLEMEN<br>T.C1Q            | FIBRINOGEN.S                    | MUSCARINIC.RECE<br>PTOR   | SM                         |
| COMPLEMEN<br>T.C3.C3A         | FIBRONECTIN                     | MYOSIN                    | SMD                        |
| COMPLEMEN<br>T.C4             | GLIADIN                         | NUCLEOLIN                 | SMD1.D2.D3                 |
| COMPLEMEN<br>T.C5             | HEPARAN.SULFATE<br>PROTEOGLYCAN | NUCLEOSOME                | SRP54                      |
| COMPLEMEN<br>T.C6             | HISTONE.H1                      | PCNA                      | SSDNA                      |
| COMPLEMEN<br>T.C7             | HISTONE.H2B                     | PEROXIREDOXIN.1           | T1F1.GAMA                  |
| COMPLEMEN<br>T.C8             | INTRINSIC.FACTOR                | PL.12                     | THYROGLOBULIN              |
|                               | JO.1                            |                           | TPO                        |
|                               | KU..P70.P80.                    |                           | TTG                        |
|                               | LA.SSB                          |                           | U1.SNRNP.68.70             |
|                               |                                 |                           | U1.SNRNP.A                 |

|                                                                   |  |  |                                                    |
|-------------------------------------------------------------------|--|--|----------------------------------------------------|
| COMPLEMEN<br>T.C9<br><br>CORE.HISTON<br>E<br><br>CRP<br><br>DSDNA |  |  | U1.SNRNP.B.B.<br><br>U1.SNRNP.C<br><br>VITRONECTIN |
|-------------------------------------------------------------------|--|--|----------------------------------------------------|

**Supplemental Table S3.** Clinical characteristics according to timing of antibiotic exposure

| <b>Characteristic</b>        | <b>Total<br/>Median<br/>(range) or<br/>N (%)</b> | <b>Antibiotic exposure<br/>only 0-6 weeks<br/>prior to ICI<br/>Median (range) or<br/>N (%)</b> | <b>Antibiotic<br/>exposure only 0-6<br/>weeks after ICI<br/>Median (range)<br/>or N (%)</b> | <b><i>P</i> value</b> |
|------------------------------|--------------------------------------------------|------------------------------------------------------------------------------------------------|---------------------------------------------------------------------------------------------|-----------------------|
| <b>Age (years)</b>           | 68 (29-92)                                       | 66.5 (29-82)                                                                                   | 67 (33-83)                                                                                  | 0.3                   |
| <b>Gender</b>                |                                                  |                                                                                                |                                                                                             |                       |
| Female                       | 98 (39)                                          | 16 (36)                                                                                        | 21 (37)                                                                                     | 1                     |
| Male                         | 153 (61)                                         | 28 (64)                                                                                        | 36 (63)                                                                                     |                       |
| <b>Race-ethnicity</b>        |                                                  |                                                                                                |                                                                                             |                       |
| Non-Hispanic white           | 193 (77)                                         | 34 (77)                                                                                        | 45 (79)                                                                                     | 1                     |
| Other                        | 58 (23)                                          | 10 (23)                                                                                        | 12 (21)                                                                                     |                       |
| <b>Cancer type</b>           |                                                  |                                                                                                |                                                                                             |                       |
| NSCLC                        | 133 (53)                                         | 19 (43)                                                                                        | 35 (61)                                                                                     | 0.09                  |
| Melanoma                     | 47 (19)                                          | 14 (32)                                                                                        | 8 (14)                                                                                      |                       |
| Other                        | 71 (28)                                          | 11 (25)                                                                                        | 14 (25)                                                                                     |                       |
| <b>BMI</b>                   |                                                  |                                                                                                |                                                                                             |                       |
| < 25                         | 103 (41)                                         | 16 (36)                                                                                        | 25 (44)                                                                                     | 0.42                  |
| ≥ 25                         | 147 (59)                                         | 28 (64)                                                                                        | 31 (54)                                                                                     |                       |
| <b>Receipt of anti-CTLA4</b> |                                                  |                                                                                                |                                                                                             |                       |
| No                           | 221 (88)                                         | 40 (91)                                                                                        | 50 (88)                                                                                     | 0.75                  |
| Yes                          | 30 (12)                                          | 4 (9)                                                                                          | 7 (12)                                                                                      |                       |

BMI, body mass index; CTLA4, cytotoxic T lymphocyte antigen 4; NSCLC, non-small cell lung cancer.



**Supplemental Table S4.** Association between antibiotic exposure and best RECIST response category.

Overall cohort

| <b>RECIST Category</b> | <b>Total n (%)</b> | <b>Any antibiotics n (%)</b> | <b>No antibiotics n (%)</b> | <b><i>P</i></b> |
|------------------------|--------------------|------------------------------|-----------------------------|-----------------|
| PD                     | 29 (12)            | 17 (13)                      | 12 (10)                     | 0.63            |
| SD                     | 89 (35)            | 51 (38)                      | 38 (33)                     |                 |
| PR                     | 53 (21)            | 25 (19)                      | 28 (24)                     |                 |
| CR                     | 8 (3)              | 4 (3)                        | 4 (3)                       |                 |

Non-small cell lung cancer cohort

| <b>RECIST Category</b> | <b>Total n (%)</b> | <b>Any antibiotics n (%)</b> | <b>No antibiotics n (%)</b> | <b><i>P</i></b> |
|------------------------|--------------------|------------------------------|-----------------------------|-----------------|
| PD                     | 16 (12)            | 11 (15)                      | 5 (8)                       | 0.5             |
| SD                     | 60 (45)            | 34 (47)                      | 26 (43)                     |                 |
| PR                     | 33 (25)            | 18 (25)                      | 15 (25)                     |                 |
| CR                     | 4 (3)              | 1 (1)                        | 3 (5)                       |                 |

CR, complete response; PD, progressive disease; PR, partial response; RECIST, Response Evaluation Criteria in Solid Tumors; SD, stable disease.

**Supplemental Table S5.** Progression-free and overall survival Cox regression.

| <b>Progression-free survival</b>                      |                            |                |                              |                |
|-------------------------------------------------------|----------------------------|----------------|------------------------------|----------------|
| <b>Covariate</b>                                      | <b>Univariate analysis</b> |                | <b>Multivariate analysis</b> |                |
|                                                       | <b>HR (95% CI)</b>         | <b>P value</b> | <b>HR (95% CI)</b>           | <b>P value</b> |
| <b>Age (continuous variable)</b>                      | 1.01 (1-1.03)              | 0.094          | 0.99 (0.97-1.01)             | 0.56           |
| <b>Antibiotic exposure</b>                            |                            |                |                              |                |
| No antibiotics                                        | Reference                  |                |                              |                |
| Any Antibiotics                                       | 1.48 (1.06-2.06)           | 0.02           | *                            | *              |
| Antibiotics 0-6 weeks before ICI                      | 1.29 (0.89-1.85)           | 0.17           | 1.24 (0.81-1.9)              | 0.33           |
| Antibiotics 0-6 weeks after ICI                       | 1.8 (1.28-2.53)            | <0.001         | 1.61 (1.06-2.45)             | 0.026          |
| <b>Number of unique antibiotics (each additional)</b> | 1.2 (1.1-1.31)             | <0.001         | *                            | *              |
| <b>BMI</b>                                            |                            |                |                              |                |
| <25                                                   | Reference                  |                |                              |                |
| ≥ 25                                                  | 0.68 (0.48-0.94)           | 0.02           | 0.77 (0.51-1.15)             | 0.2            |
| <b>Male gender</b>                                    |                            |                |                              |                |
| Female                                                | Reference                  |                |                              |                |
| Male                                                  | 1.04 (0.74-1.47)           | 0.81           | 1.32 (0.87-2.03)             | 0.2            |
| <b>Cancer type</b>                                    |                            |                |                              |                |
| Other                                                 | Reference                  |                |                              |                |
| NSCLC                                                 | 1.03 (0.71-1.5)            | 0.86           | 1.15 (0.74-1.8)              | 0.53           |
| Melanoma                                              | 0.41 (0.22-0.75)           | 0.004          | 0.42 (0.19-0.93)             | 0.033          |
| <b>Anti-CTLA-4</b>                                    |                            |                |                              |                |
| Not received                                          | Reference                  |                |                              |                |
| Received                                              | 1.23 (0.73-2.08)           | 0.43           | 1.28 (0.64-2.56)             | 0.48           |
| <b>Cancer stage</b>                                   |                            |                |                              |                |
| Stage I-II                                            | Reference                  |                |                              |                |
| Stage III                                             | 1.13 (0.46-2.77)           | 0.79           | 1.23 (0.48-3.14)             | 0.66           |
| Stage IV                                              | 1.98 (0.87-4.53)           | 0.1            | 1.64 (0.7-3.83)              | 0.25           |
| <b>ECOG performance status</b>                        |                            |                |                              |                |
| 0-1                                                   | Reference                  |                |                              |                |
| 2-4                                                   | 2.09 (1.3-3.34)            | 0.002          | 1.34 (0.76-2.35)             | 0.31           |

| Overall survival                                      |                     |         |                       |         |
|-------------------------------------------------------|---------------------|---------|-----------------------|---------|
| Covariate                                             | Univariate analysis |         | Multivariate analysis |         |
|                                                       | HR (95% CI)         | P value | HR (95% CI)           | P value |
| <b>Age (continuous variable)</b>                      | 1.02 (1-1.04)       | 0.01    | 1.01 (0.99-1.03)      | 0.36    |
| <b>Antibiotic exposure</b>                            |                     |         |                       |         |
| No antibiotics                                        | Reference           |         |                       |         |
| Any Antibiotics                                       | 1.7 (1.22-2.36)     | 0.002   | *                     | *       |
| Antibiotics 0-6 weeks before ICI                      | 1.12 (0.79-1.61)    | 0.52    | 1.12 (0.74-1.72)      | 0.59    |
| Antibiotics 0-6 weeks after ICI                       | 2.32 (1.67-3.23)    | <0.001  | 2.35 (1.57-3.53)      | <0.001  |
| <b>Number of unique antibiotics (each additional)</b> | 1.27 (1.17-1.37)    | <0.001  | *                     | *       |
| <b>BMI</b>                                            |                     |         |                       |         |
| <25                                                   | Reference           |         |                       |         |
| ≥ 25                                                  | 0.7 (0.51-0.97)     | 0.034   | 0.88 (0.6-1.29)       | 0.5     |
| <b>Gender</b>                                         |                     |         |                       |         |
| Female                                                | Reference           |         |                       |         |
| Male                                                  | 1.05 (0.75-1.46)    | 0.8     | 1.39 (0.92-2.09)      | 0.12    |
| <b>Cancer type</b>                                    |                     |         |                       |         |
| Other                                                 | Reference           |         |                       |         |
| NSCLC                                                 | 1.33 (0.91-1.94)    | 0.14    | 1.44 (0.91-2.27)      | 0.12    |
| Melanoma                                              | 0.42 (0.23-0.8)     | 0.008   | 0.42 (0.19-0.96)      | 0.039   |
| <b>Anti-CTLA-4</b>                                    |                     |         |                       |         |
| Not received                                          | Reference           |         |                       |         |
| Received                                              | 0.91 (0.54-1.54)    | 0.73    | 1.06 (0.55-2.04)      | 0.86    |
| <b>Cancer stage</b>                                   |                     |         |                       |         |
| Stage I-II                                            | Reference           |         |                       |         |
| Stage III                                             | 0.88 (0.37-2.09)    | 0.77    | 0.78 (0.31-1.97)      | 0.61    |
| Stage IV                                              | 1.62 (0.75-3.5)     | 0.21    | 1.27 (0.58-2.81)      | 0.55    |
| <b>ECOG performance status</b>                        |                     |         |                       |         |
| 0-1                                                   | Reference           |         |                       |         |
| 2-4                                                   | 2.45 (1.53-3.93)    | <0.001  | 1.39 (0.78-2.46)      | 0.26    |

BMI, body mass index; CTLA4, cytotoxic T lymphocyte antigen 4; ECOG, Eastern Cooperative Oncology Group; HR, hazard ratio; ICI, immune checkpoint inhibitor; NSCLC, non-small cell lung cancer.

\*Not calculated as highly correlated to antibiotics before and after ICI

**Supplemental Table S6.** Progression-free and overall survival Cox regression in non-small cell lung cancer cases.

| <b>Progression-free survival</b>                      |                            |                |                              |                |
|-------------------------------------------------------|----------------------------|----------------|------------------------------|----------------|
| <b>Covariate</b>                                      | <b>Univariate analysis</b> |                | <b>Multivariate analysis</b> |                |
|                                                       | <b>HR (95% CI)</b>         | <b>P value</b> | <b>HR (95% CI)</b>           | <b>P value</b> |
| <b>Age (continuous variable)</b>                      | 0.99 (0.97-1.04)           | 0.64           | 0.99 (0.96-1.02)             | 0.55           |
| <b>Antibiotic exposure</b>                            |                            |                |                              |                |
| No antibiotics                                        | Reference                  |                |                              |                |
| Any Antibiotics                                       | 1.37 (0.89-2.09)           | 0.15           | *                            | *              |
| Antibiotics 0-6 weeks before ICI                      | 1.31 (0.81-2.12)           | 0.27           | 1.15 (0.68-1.95)             | 0.61           |
| Antibiotics 0-6 weeks after ICI                       | 1.49 (0.96-2.33)           | 0.08           | 1.63 (0.96-2.77)             | 0.069          |
| <b>Number of unique antibiotics (each additional)</b> | 1.15 (1.03-1.28)           | 0.01           | *                            | *              |
| <b>BMI</b>                                            |                            |                |                              |                |
| <25                                                   | Reference                  |                |                              |                |
| ≥ 25                                                  | 0.71 (0.46-1.09)           | 0.12           | 0.72 (0.44-1.18)             | 0.19           |
| <b>Male gender</b>                                    |                            |                |                              |                |
| Female                                                | Reference                  |                |                              |                |
| Male                                                  | 1.2 (0.78-1.85)            | 0.41           | 1.34 (0.82 - 2.22)           | 0.25           |
| <b>Anti-CTLA-4</b>                                    |                            |                |                              |                |
| Not received                                          | Reference                  |                |                              |                |
| Received                                              | 0.93 (0.23-3.81)           | 0.92           | 0.77 (0.18-3.29)             | 0.72           |
| <b>Cancer stage</b>                                   |                            |                |                              |                |
| Stage I-II                                            | Reference                  |                |                              |                |
| Stage III                                             | 1.06(0.39-2.89)            | 0.91           | 0.92(0.32-2.67)              | 0.88           |
| Stage IV                                              | 1.32(0.53-3.3)             | 0.55           | 1.2(0.47-3.08)               | 0.71           |
| <b>ECOG performance status</b>                        |                            |                |                              |                |
| 0-1                                                   | Reference                  |                |                              |                |
| 2-4                                                   | 1.76(0.93-3.35)            | 0.084          | 1.47(0.75-2.9)               | 0.27           |

| Overall survival                                      |                     |         |                       |         |
|-------------------------------------------------------|---------------------|---------|-----------------------|---------|
| Covariate                                             | Univariate analysis |         | Multivariate analysis |         |
|                                                       | HR (95% CI)         | P value | HR (95% CI)           | P value |
| <b>Age (continuous variable)</b>                      | 1 (0.98-1.02)       | 0.84    | 1.01 (0.98 - 1.03)    | 0.58    |
| <b>Antibiotic exposure</b>                            |                     |         |                       |         |
| No antibiotics                                        | Reference           |         |                       |         |
| Any Antibiotics                                       | 1.83 (1.21-2.76)    | <0.01   | *                     | *       |
| Antibiotics 0-6 weeks before ICI                      | 1.4 (0.88-2.22)     | 0.2     | 1.23 (0.73-2.05)      | 0.44    |
| Antibiotics 0-6 weeks after ICI                       | 1.93 (1.27-2.93)    | <0.01   | 2.75 (1.67-4.54)      | <0.001  |
| <b>Number of unique antibiotics (each additional)</b> | 1.22 (1.12-1.33)    | <0.01   | *                     | *       |
| <b>BMI</b>                                            |                     |         |                       |         |
| <25                                                   | Reference           |         |                       |         |
| ≥ 25                                                  | 0.8 (0.53-1.21)     | 0.29    | 0.84 (0.53-1.34)      | 0.46    |
| <b>Gender</b>                                         |                     |         |                       |         |
| Female                                                | Reference           |         |                       |         |
| Male                                                  | 1.23 (0.82-1.86)    | 0.32    | 1.39 (0.87-2.23)      | 0.17    |
| <b>Anti-CTLA-4</b>                                    |                     |         |                       |         |
| Not received                                          | Reference           |         |                       |         |
| Received                                              | 0.59 (0.14-2.39)    | 0.46    | 0.53 (0.13-2.18)      | 0.38    |
| <b>Cancer stage</b>                                   |                     |         |                       |         |
| Stage I-II                                            | Reference           |         |                       |         |
| Stage III                                             | 0.69 (0.28-1.72)    | 0.43    | 0.51 (0.19-1.36)      | 0.18    |
| Stage IV                                              | 0.96(0.44-2.1)      | 0.93    | 0.82 (0.37-1.85)      | 0.63    |
| <b>ECOG performance status</b>                        |                     |         |                       |         |
| 0-1                                                   | Reference           |         |                       |         |
| 2-4                                                   | 2.1 (1.11-3.97)     | 0.023   | 1.79 (0.92-3.5)       | 0.089   |

BMI, body mass index; CTLA4, cytotoxic T lymphocyte antigen 4; ECOG, Eastern Cooperative Oncology Group; HR, hazard ratio; ICI, immune checkpoint inhibitor; NSCLC, non-small cell lung cancer.

\*Not calculated as highly correlated to antibiotics before and after ICI

**Supplemental Figure S1.**

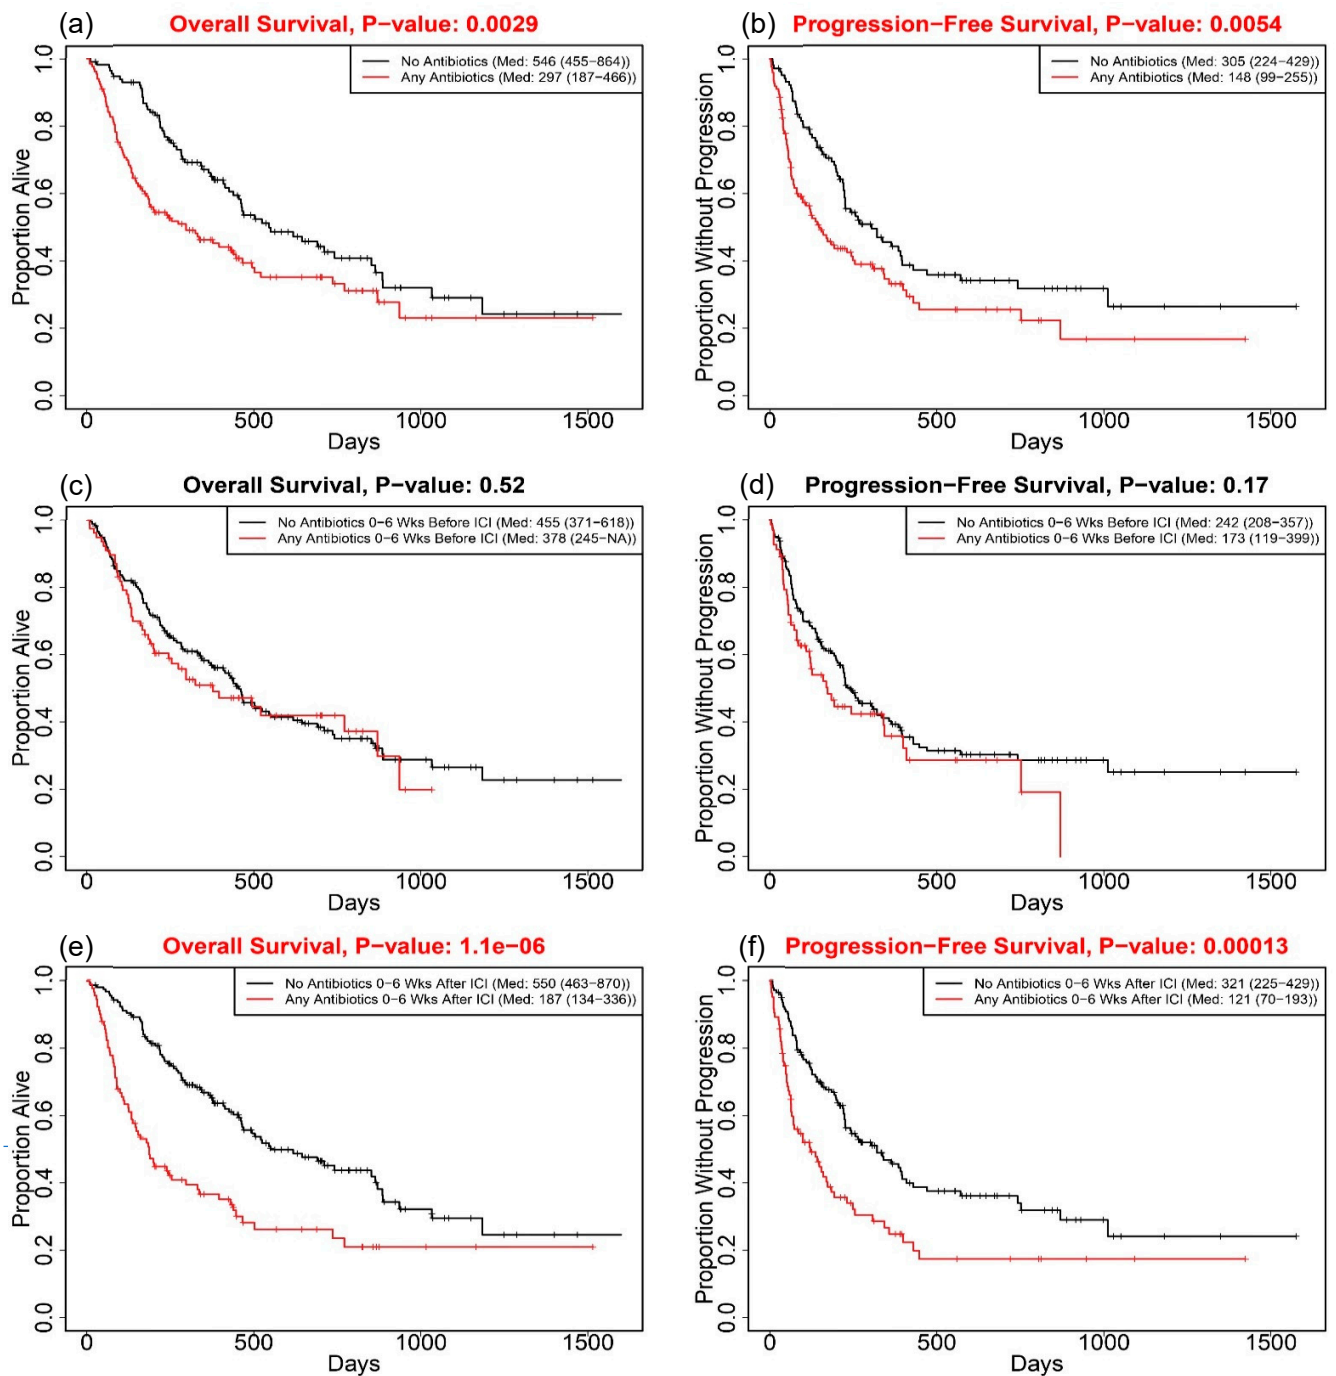

**Supplemental Figure S1.** Clinical outcomes according to antibiotic exposure. *(a)* OS, any antibiotic exposure; *(b)* PFS, any antibiotic exposure; *(c)* OS, antibiotic exposure pre-ICI initiation; *(d)* PFS, antibiotic exposure pre-ICI initiation; *(e)* OS, antibiotic exposure post-ICI initiation; *(f)* PFS, antibiotic exposure post-ICI initiation

Supplemental Figure S2.

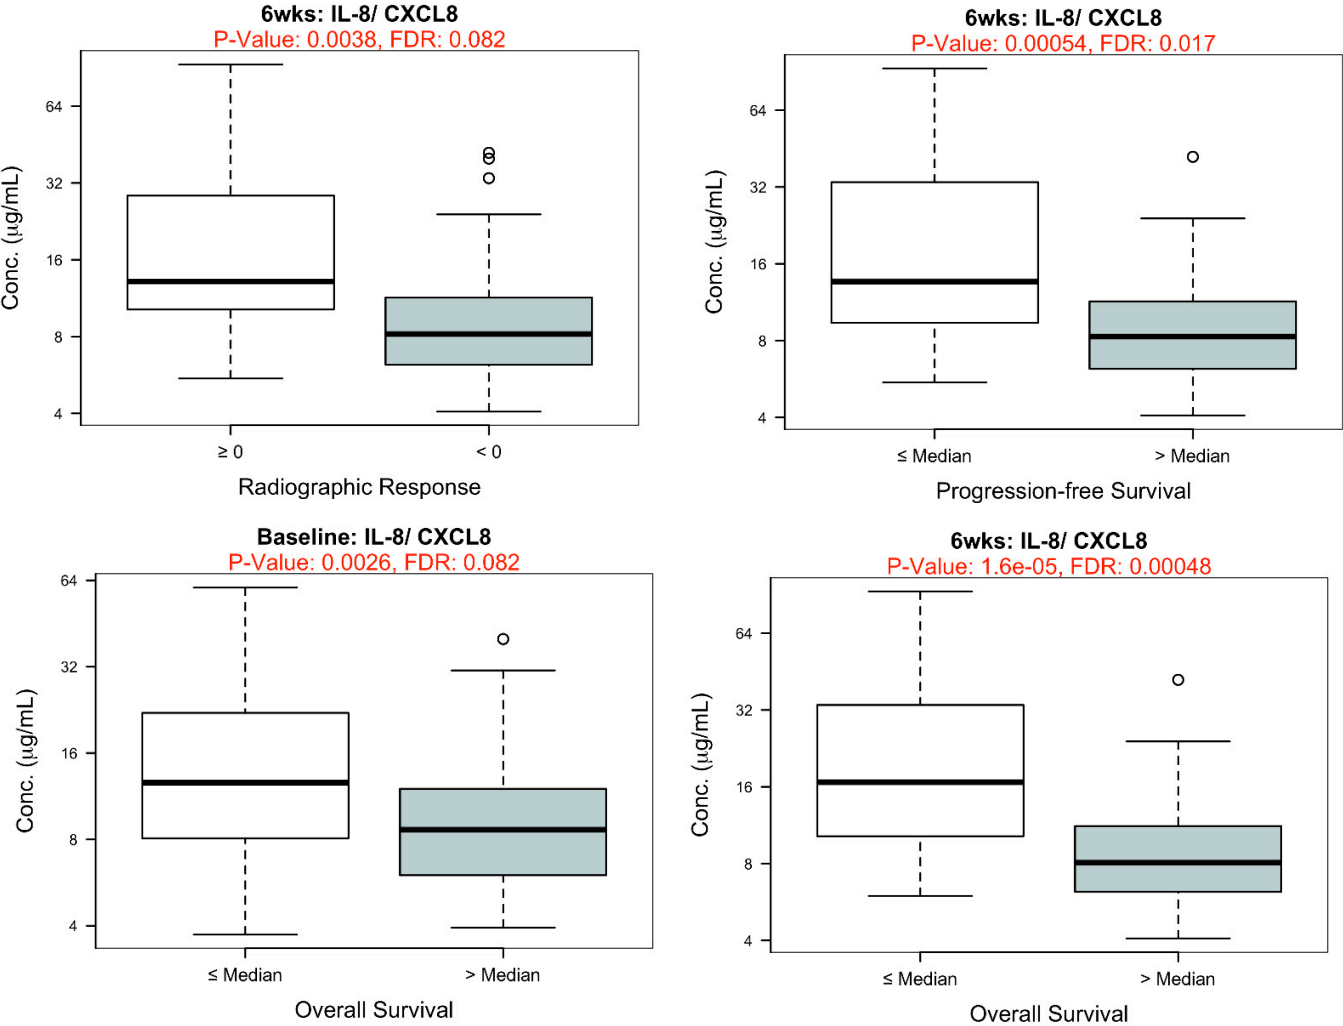

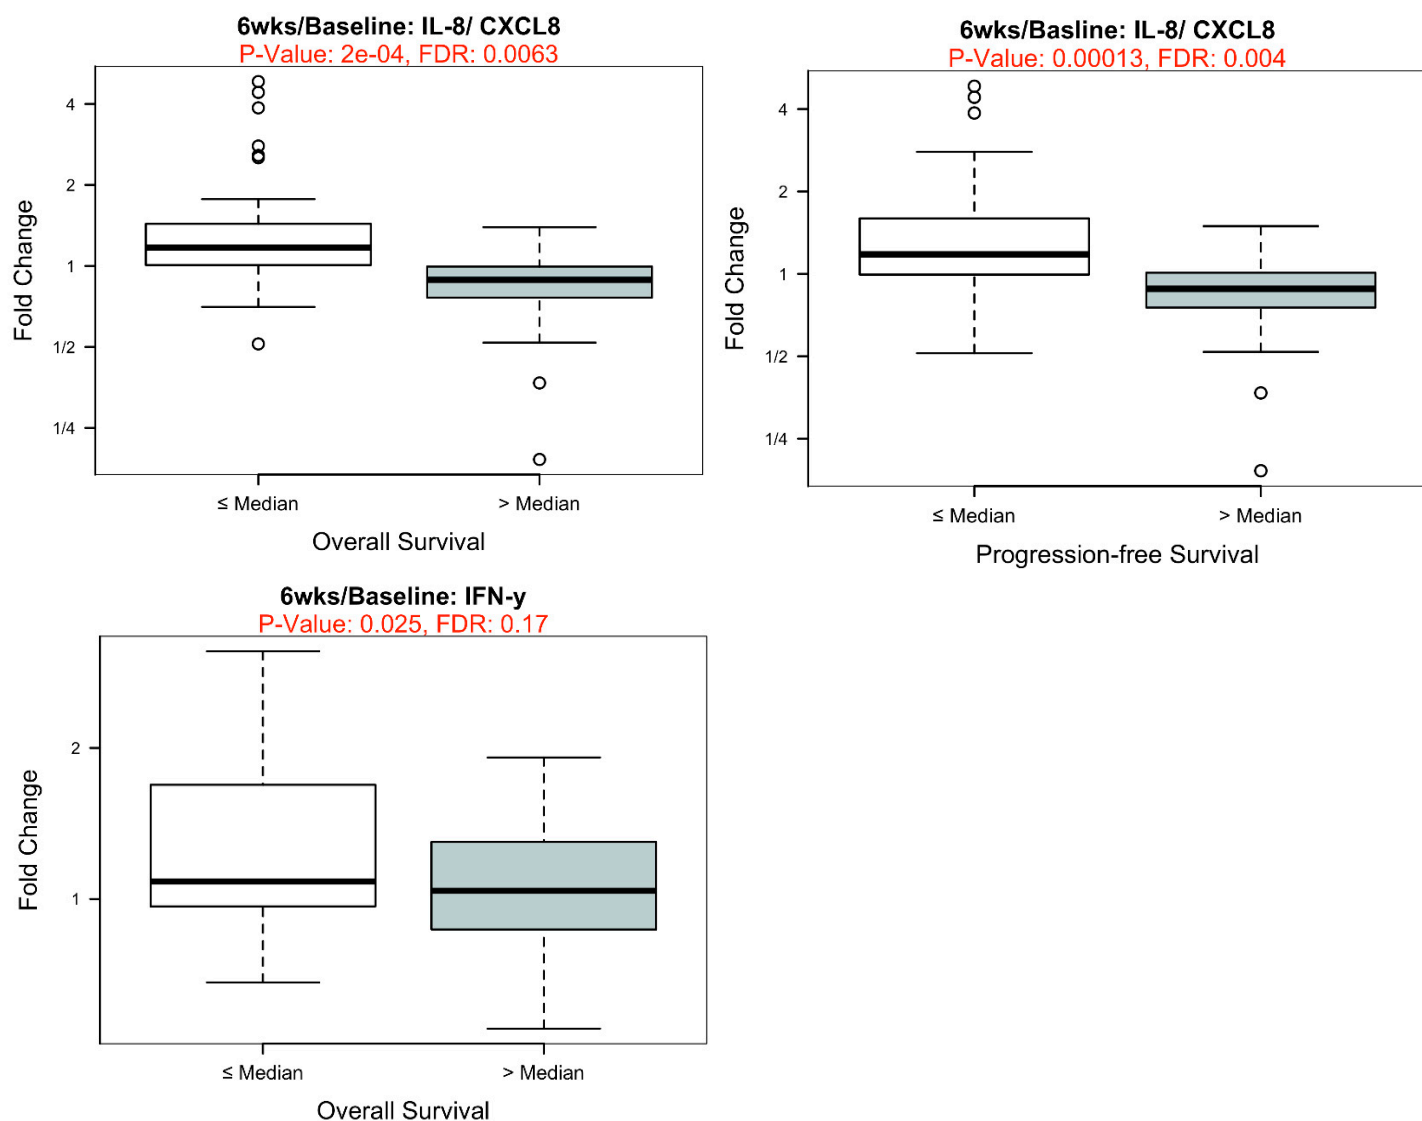

**Supplemental Figure S2.** Significant associations between clinical outcomes and the systemic immune parameters identified as associated with antibiotic exposure in the non-small cell lung cancer cohort.
